# Supplementary material for: Improved performance of perovskite solar cellsviacombining Pb–Sn alloying with the passivation effect of SnI2
Source: Royal Society of Chemistry journal article supplement (doi:10.1039/d2se01162j), 2022-01-01
Supplement: d2se01162j1.pdf [file d2se01162j1.pdf]

## Supporting Information

### Improved performance of perovskite solar cells via combining Pb-Sn alloying with passivation effect of SnI<sub>2</sub>

Hangyu Hu,<sup>a</sup> Yu Li,<sup>a</sup> Mengxin Wang,<sup>a</sup> Yan Feng,<sup>a</sup> Yanjing Rong,<sup>a</sup> Zhitao Shen,<sup>a</sup> Huilin Li,<sup>a,\*</sup> Fumin Li<sup>a,\*</sup> and Chong Chen<sup>a,\*</sup>

<sup>a</sup> Henan Key Laboratory of Photovoltaic Materials, Henan University, Kaifeng 475004, P. R. China.

\*Corresponding Author. **E-mails:** leehl@henu.edu.cn (H. Li); lifm@henu.edu.cn (F. Li); chongchen@henu.edu.cn (C. Chen). **ORCID:** 0000-0002-1780-0691 (H. Li); 0000-0002-2297-539X (F. Li); 0000-0003-2940-2030 (C. Chen).

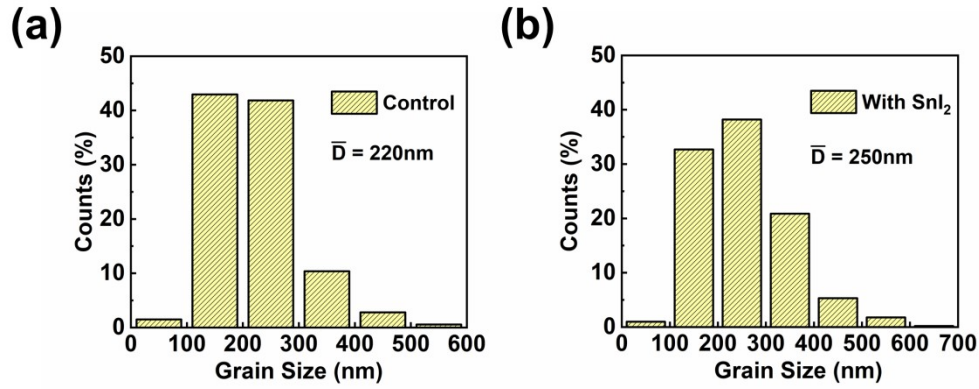

**Fig. S1** Statistical graph of perovskite grain size of CsFAMA(Pb) and CsFAMA(Pb-Sn) thin films using ITO/SnO<sub>2</sub> as substrate.

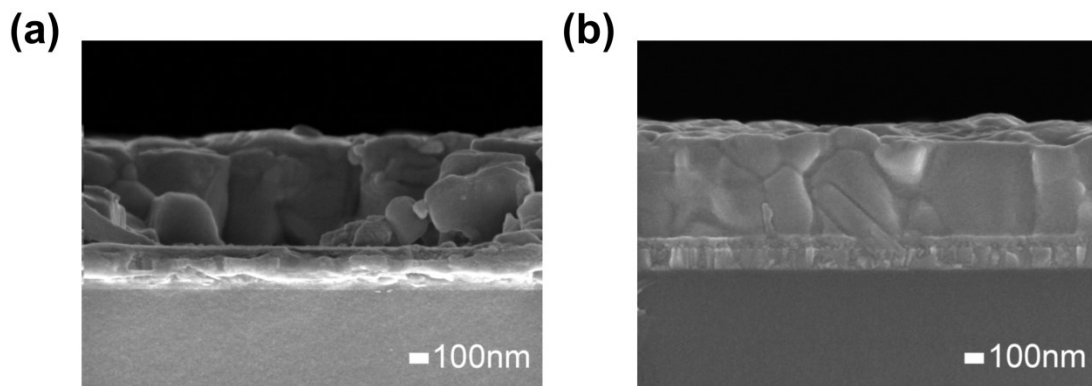

**Fig. S2** SEM cross-sectional images of CsFAMA(Pb) and CsFAMA(Pb-Sn) thin films on ITO/SnO<sub>2</sub> substrates.

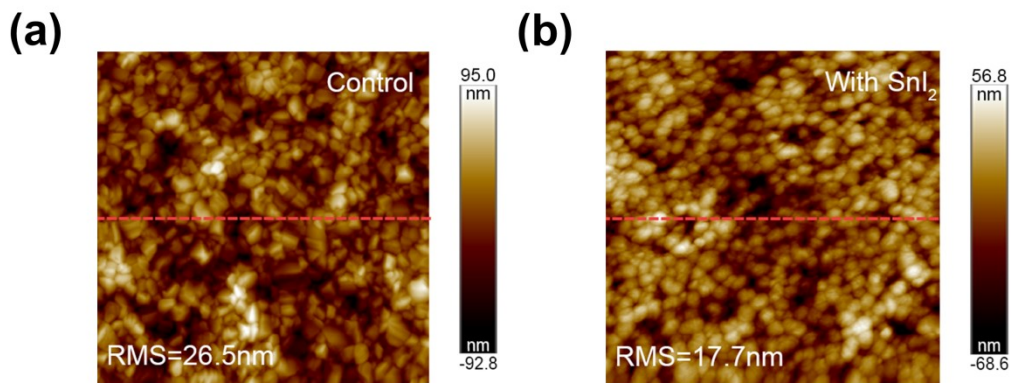

**Fig. S3** 2D AFM images of (a) pure CsFAMA(Pb) and (b) CsFAMA(Pb-Sn) thin films on ITO/SnO<sub>2</sub> substrates.

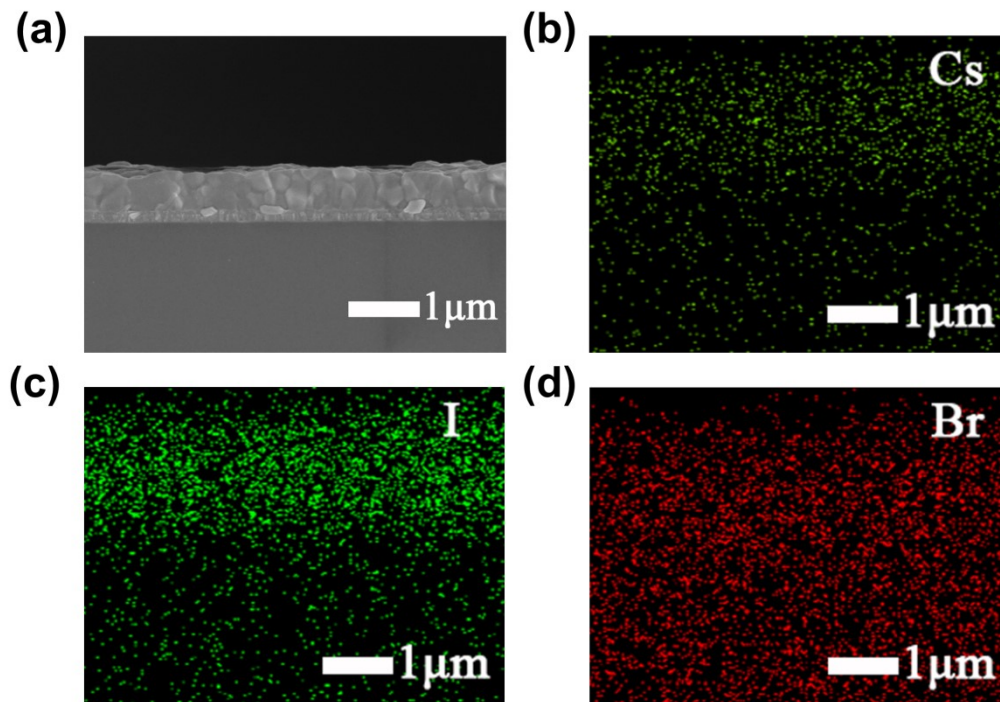

**Fig. S4** Cross-sectional SEM image of ITO/SnO<sub>2</sub>/CsFAMA(Pb-Sn) film and EDS mapping of (b) Cs, (c) I, (d) Br.

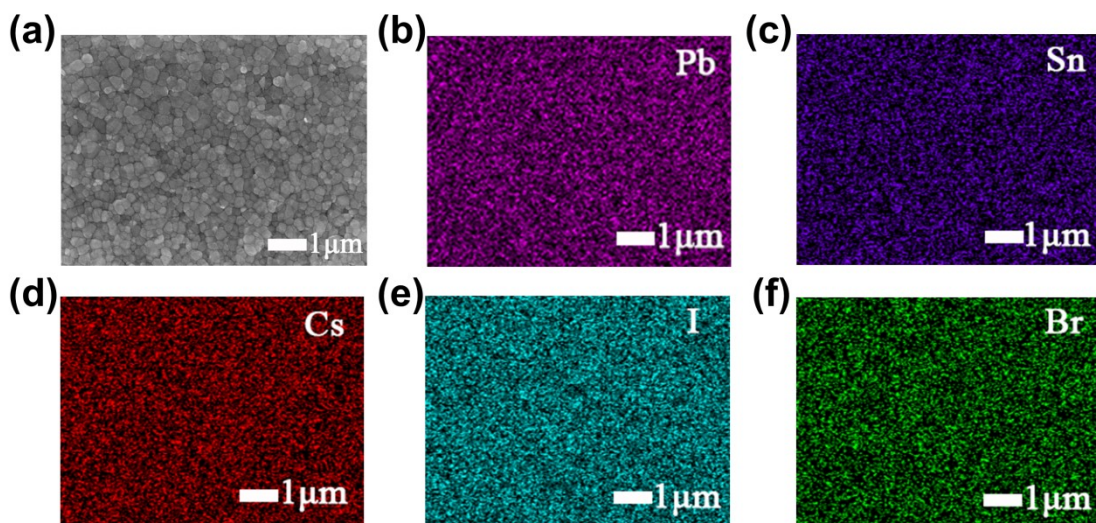

**Fig. S5** (a) top-view SEM image of ITO/SnO<sub>2</sub>/CsFAMA(Pb-Sn) films for EDS mapping, and EDS mapping of (b) Pb, (c) Sn, (d) Cs, (e) I, and (f) Br.

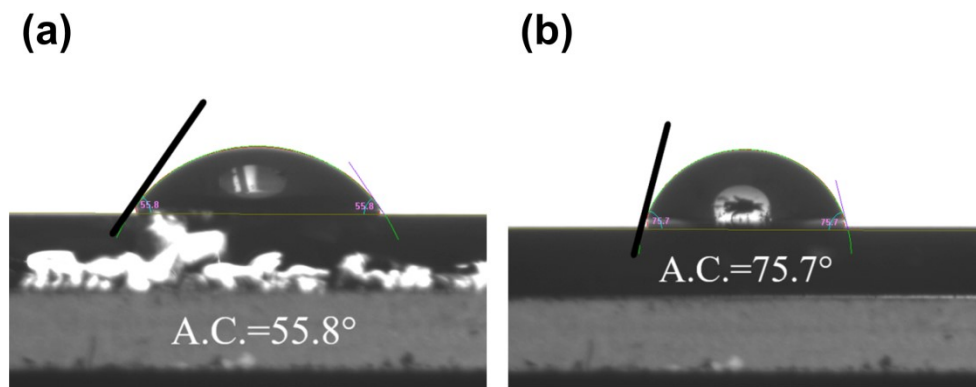

**Fig. S6** The water contact angle: (a) ITO/ SnO<sub>2</sub>/CsFAMA(Pb) and (b) ITO/SnO<sub>2</sub>/CsFAMA(Pb-Sn).

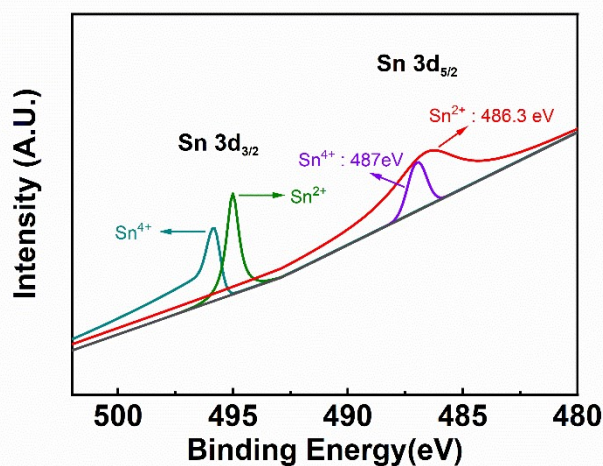

**Fig. S7** The X-ray photoelectron spectroscopy (XPS) measurements for the Pb-based perovskite films with treating SnI<sub>2</sub>.

**Table S1** The change of the main diffraction peaks and the lattice constants for perovskite films with/without SnI<sub>2</sub>.

| Crystal Face          | Peak Position |        |        |        |        |        | Lattice parameters |       |       |
|-----------------------|---------------|--------|--------|--------|--------|--------|--------------------|-------|-------|
|                       | (100)         | (110)  | (111)  | (200)  | (210)  | (211)  | a/Å                | b/Å   | c/Å   |
| Control               | 14.209        | 20.109 | 24.670 | 28.497 | 31.935 | 35.104 | 6.241              | 6.241 | 6.343 |
| With SnI <sub>2</sub> | 14.179        | 20.079 | 24.614 | 28.467 | 31.904 | 35.048 | 6.251              | 6.251 | 6.345 |
